# Supplementary material for: Effect of a quality improvement package for intrapartum and immediate newborn care on fresh stillbirth and neonatal mortality among preterm and low-birthweight babies in Kenya and Uganda: a cluster-randomised facility-based trial
Source: PubMed Central journal article supplement (PMC7388203; doi:10.1016/s2214-109x(20)30232-1), 2020-07-22
Supplement: mmc1.pdf [file mmc1.pdf]

# THE LANCET

## Global Health

### Supplementary appendix

This appendix formed part of the original submission and has been peer reviewed. We post it as supplied by the authors.

Supplement to: Walker D, Otieno P, Butrick E, et al. Effect of a quality improvement package for intrapartum and immediate newborn care on fresh stillbirth and neonatal mortality among preterm and low-birthweight babies in Kenya and Uganda: a cluster-randomised facility-based trial. *Lancet Glob Health* 2020; **8**: e1061–70.

## Appendix

**Table 1: Facility characteristics at matching**

|                                                                          | <b>Control<br/>N=10 facilities</b> | <b>Intervention<br/>N=10 facilities</b> | <b>Total<br/>N=20 facilities</b> | <b>p value<sup>^</sup></b> |
|--------------------------------------------------------------------------|------------------------------------|-----------------------------------------|----------------------------------|----------------------------|
| Monthly delivery volume, mean (SD)                                       | 93 (82)                            | 75 (51)                                 | 84 (67)                          | 0.57                       |
| Deliveries to staff ratio, mean (SD)                                     | 63 (28)                            | 52 (25)                                 | 58 (26)                          | 0.39                       |
| Stillbirth proportion, median % (IQR)                                    | 1 (0-3-4)                          | 2 (1-4)                                 | 1 (1-4)                          | 0.38                       |
| LBW proportion, median % (IQR)                                           | 4 (3-7)                            | 6 (2-6)                                 | 5 (3-6)                          | 0.97                       |
| Pre-discharge newborn mortality, median % (IQR)                          | 0 (0-1)                            | 0.5 (0-1)                               | 0 (0-1)                          | 0.83                       |
| Caesarean section rate at 6 caesarean-capable facilities, median % (IQR) | 20 (16-20)                         | 47 (11-47)                              | 21 (18-27)                       | <0.001                     |

<sup>^</sup>Two tailed paired t-test for means, Mann-Whitney U-test for medians

**Table 2: Difference in the primary outcomes for facility pairs**

| Pair                                        | Intervention (odds)* | Control (odds)* | Odds Ratio <sup>~</sup>   |
|---------------------------------------------|----------------------|-----------------|---------------------------|
| 1                                           | 0.03                 | 0.09            | 0.32                      |
| 2                                           | 0.24                 | 0.28            | 0.85                      |
| 3                                           | 0.36                 | 0.35            | 1.02                      |
| 4                                           | 0.15                 | 0.16            | 0.91                      |
| 5                                           | 0.10                 | 0.15            | 0.67                      |
| 6                                           | 0.62                 | 0.71            | 0.88                      |
| 7                                           | 0.60                 | 0.38            | 1.56                      |
| 8                                           | 0.17                 | 0.14            | 1.21                      |
| 9                                           | 0.07                 | 0.37            | 0.20                      |
| 10                                          | 0.07                 | 0.13            | 0.50                      |
| Exponentiated mean log odds ratio (95% CI): |                      |                 | 0.70 (0.49-0.99)          |
|                                             |                      |                 | p value=0.04 <sup>^</sup> |

\*weighted by the number of deliveries within each facility

<sup>^</sup>two tailed paired t-test

<sup>~</sup> Intervention log odds - control log odds = log odds ratio (exponentiated)

**Table 3: Additional outcomes among all births occurring at study facilities with adjustment for matching and clustering**

|                                 | Control   |     | Intervention |     | Odds Ratio | 95% CI |       | p value |
|---------------------------------|-----------|-----|--------------|-----|------------|--------|-------|---------|
|                                 | $n_c/N_c$ | %   | $n_i/N_i$    | %   |            | Lower  | Upper |         |
| Fresh stillbirth                | 674/30726 | 2.2 | 300/23194    | 1.3 | 0.84       | 0.59   | 1.19  | 0.32    |
| Pre-discharge newborn mortality | 363/30726 | 1.2 | 217/23194    | 0.9 | 0.90       | 0.74   | 1.09  | 0.29    |

$n_{c/i}$  = number with outcomes in the control/intervention arm  $N_{c/i}$  = Total number of non-missing eligible births in the control/intervention arm

**Table 4a and 4b. Characteristics of the infants who were excluded from the study versus those who were included, aggregated totals (4a) and separated by intervention and control (4b).**

4a.

| Characteristics                     | n <sub>1</sub> # | Eligible but excluded* | n <sub>2</sub> # | Eligible and included | p-value <sup>†</sup> |
|-------------------------------------|------------------|------------------------|------------------|-----------------------|----------------------|
| Preterm fresh stillbirth            | 2436             | 0 (0)                  | 2909             | 9.2 (268)             | NA                   |
| Pre-discharge mortality             | 2436             | 4.0 (97)               | 2909             | 3.7 (108)             | 0.61                 |
| Pre-discharge maternal mortality    | 2196             | 0.3 (7)                | 2772             | 0.7 (18)              | 0.10                 |
| Apgar at 5 min <7 live births       | 2436             | 4.8 (118)              | 2909             | 9.9 (287)             | <0.001               |
| Maternal age (years)                | 2423             |                        | 2895             |                       |                      |
| <18                                 |                  | 10.7 (259)             |                  | 11.4 (329)            |                      |
| 18-35                               |                  | 83.5 (2024)            |                  | 83.5 (2417)           |                      |
| >35                                 |                  | 5.8 (140)              |                  | 5.2 (149)             | 0.47                 |
| Caesarean delivery (mothers)        | 2404             | 23.0 (552)             | 2863             | 21.6 (617)            | 0.22                 |
| Multiple gestation                  | 2436             | 19.6 (477)             | 2909             | 21.1 (614)            | 0.17                 |
| Low birth weight (<2500 g)          | 2436             | 64.8 (1579)            | 2909             | 75.8 (2206)           | <0.001               |
| Sex, male                           | 2436             | 46.2 (1125)            | 2909             | 47.7 (1387)           | 0.28                 |
| Birth weight in grams (Mean, SD)    | 2436             | 2252 (451)             | 2909             | 2174 (440)            | <0.001               |
| Gestational age in weeks (Mean, SD) | 2268             | 35.1 (3.4)             | 2848             | 35.0 (3.5)            | 0.051                |

\*Exclusion due to failure to consent, declined participation, could not trace/contact

#n<sub>1</sub> and n<sub>2</sub> are total denominators for the control and intervention group, respectively.

<sup>†</sup>Chi-squared test of proportions or unpaired t-test for means.

## 4b.

|                                     | Eligible but excluded* |                |                  |                     |                      | Eligible and included |                |                  |                     |                      |
|-------------------------------------|------------------------|----------------|------------------|---------------------|----------------------|-----------------------|----------------|------------------|---------------------|----------------------|
|                                     | n <sub>1</sub> #       | Control = 1361 | n <sub>2</sub> # | Intervention = 1075 | p-value <sup>†</sup> | n <sub>1</sub> #      | Control = 1474 | n <sub>2</sub> # | Intervention = 1435 | p-value <sup>†</sup> |
| Preterm fresh stillbirth            | 1361                   | 0 (0)          | 1075             | 0 (0)               | NA                   | 1474                  | 11.9 (175)     | 1435             | 6.5 (93)            | <0.001               |
| Pre-discharge mortality             | 1361                   | 5.2 (71)       | 1075             | 2.4 (26)            | <0.001               | 1474                  | 4.1 (61)       | 1435             | 3.3 (47)            | 0.22                 |
| Pre-discharge maternal mortality    | 1229                   | 0.2 (3)        | 967              | 0.4 (4)             | 0.48                 | 1425                  | 0.8 (12)       | 1347             | 0.5 (6)             | 0.19                 |
| Apgar at 5 min <7 live births       | 1361                   | 5.4 (74)       | 1075             | 4.1 (44)            | <0.001               | 1474                  | 12.7 (187)     | 1435             | 7.0 (100)           | <0.001               |
| Maternal age (years)                | 1354                   |                | 1069             |                     |                      | 1468                  |                | 1427             |                     |                      |
| <18                                 |                        | 9.3 (126)      |                  | 12.4 (133)          |                      |                       | 9.6 (141)      |                  | 13.2 (188)          |                      |
| 18-35                               |                        | 83.8 (1134)    |                  | 83.3 (890)          |                      |                       | 84.9 (1246)    |                  | 82.1 (1171)         |                      |
| >35                                 |                        | 6.9 (94)       |                  | 4.3 (46)            | 0.002                |                       | 5.5 (81)       |                  | 4.8 (68)            | 0.008                |
| Caesarean delivery (mothers)        | 1336                   | 26.5 (354)     | 1068             | 18.5 (198)          | <0.001               | 1433                  | 26.9 (385)     | 1430             | 16.2 (232)          | <0.001               |
| Multiple gestation                  | 1361                   | 22.6 (308)     | 1075             | 15.7 (169)          | <0.001               | 1474                  | 21.9 (322)     | 1435             | 20.4 (292)          | 0.32                 |
| Low birth weight (<2500 g)          | 1361                   | 66.8 (909)     | 1075             | 62.3 (670)          | 0.02                 | 1474                  | 76.9 (1133)    | 1435             | 74.8 (1073)         | 0.19                 |
| Sex, male                           | 1361                   | 45.6 (620)     | 1075             | 47.0 (505)          | 0.49                 |                       | 47.8 (705)     |                  | 47.5 (682)          | 0.87                 |
| Birth weight in grams (Mean, SD)    | 1361                   | 2229 (456)     | 1075             | 2283 (443)          | 0.004                | 1474                  | 2144 (446)     | 1435             | 2206 (431)          | <0.001               |
| Gestational age in weeks (Mean, SD) | 1274                   | 35.1 (3.3)     | 994              | 35.1 (3.4)          | 0.95                 | 1437                  | 34.9 (3.5)     | 1411             | 35.0 (3.4)          | 0.44                 |

\*Exclusion due to failure to consent, declined participation, could not trace/contact

#n<sub>1</sub> and n<sub>2</sub> are total denominators for the control and intervention group, respectively.

<sup>†</sup>Chi-squared test of proportions or unpaired t-test for means.

**Figure 1.** Conceptual diagram showing the relationship between the intervention and the outcome along with the potential confounders and mediators.

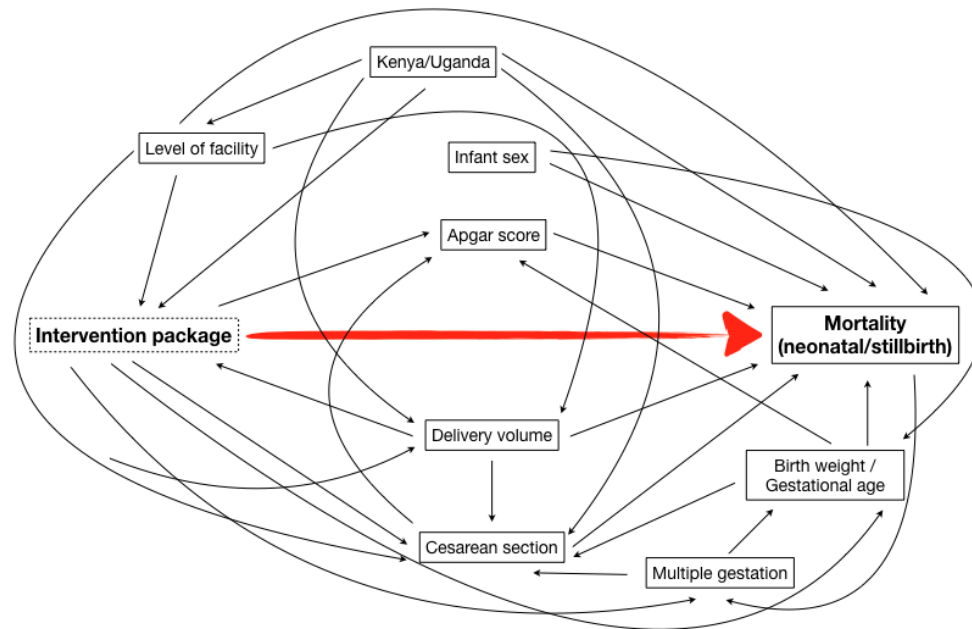

We used this directed acyclic graph to show the relationship under investigation within the context of potential confounders and mediators.

- The red arrow shows the hypothesized relationship under investigation.
- **Delivery volume** depends on the level of facility. A higher-level facility that has high delivery load is more likely to have more c-sections, it is more likely to have higher volume of poor outcomes because they get more serious and referred cases. Because of the higher volume there may be greater investment in improving facility resources and/or capacity building of human resources. In contrast, because of the high work load they may have less time to invest in the simulation training or participate in QI collaboratives.
- **Apgar score** is a potential mediator because it indicates health status of newborn immediately after birth and it is also likely to have been influenced by the intervention, thus on the causal pathway.
- Performance of **cesarean section** may be influenced by the intervention package. Providers may be more or less likely to turn to a cesarean section if preterm birth is suspected. Similarly, increased vigilance of intrapartum care may result in higher incidence of cesarean section for intrauterine fetal distress. Performance of cesarean section may impact the likelihood of a very preterm infant being delivered by CS only to die shortly after birth vs becoming a fresh stillbirth.

- **Infant sex.** Male infants are at higher risk of mortality, in general, and we also know that female infants are at higher risk of born with intrauterine growth retardation in low- and middle-income countries. There may be provider or societal biases that lead to greater efforts to save infants of one sex or the other.
- Although the intervention was the same, its implementation is likely to have differences because of inherent differences between the sites in **Kenya and Uganda**. The facilities in these countries are different in terms of the services they provide and the number of deliveries they cater to. There may also be differences in the underlying provider skill or competencies for managing preterm labor and birth.
- **Birthweight** together with gestational age are the largest determinants of newborn survival. Among preterm infants there is a wide array of birthweights and gestational ages that are directly related to newborn survival.



## CONSORT 2010 checklist

| Section/Topic                    | Item No | Standard Checklist item                                                                                                                 | Extension for cluster designs                                                                                                                                                                                      |
|----------------------------------|---------|-----------------------------------------------------------------------------------------------------------------------------------------|--------------------------------------------------------------------------------------------------------------------------------------------------------------------------------------------------------------------|
| <b>Title and abstract</b>        |         |                                                                                                                                         |                                                                                                                                                                                                                    |
|                                  | 1a      | Identification as a randomised trial in the title                                                                                       | Identification as a cluster randomised trial in the title                                                                                                                                                          |
|                                  | 1b      | Structured summary of trial design, methods, results, and conclusions (for specific guidance see CONSORT for abstracts) <sup>i,ii</sup> | See table 2                                                                                                                                                                                                        |
| <b>Introduction</b>              |         |                                                                                                                                         |                                                                                                                                                                                                                    |
| <b>Background and objectives</b> | 2a      | Scientific background and explanation of rationale                                                                                      | Rationale for using a cluster design                                                                                                                                                                               |
|                                  | 2b      | Specific objectives or hypotheses                                                                                                       | Whether objectives pertain to the cluster level, the individual participant level or both                                                                                                                          |
| <b>Methods</b>                   |         |                                                                                                                                         |                                                                                                                                                                                                                    |
| <b>Trial design</b>              | 3a      | Description of trial design (such as parallel, factorial) including allocation ratio                                                    | Definition of cluster and description of how the design features apply to the clusters                                                                                                                             |
|                                  | 3b      | Important changes to methods after trial commencement (such as eligibility criteria), with reasons                                      |                                                                                                                                                                                                                    |
| <b>Participants</b>              | 4a      | Eligibility criteria for participants                                                                                                   | Eligibility criteria for clusters                                                                                                                                                                                  |
|                                  | 4b      | Settings and locations where the data were collected                                                                                    |                                                                                                                                                                                                                    |
| <b>Interventions</b>             | 5       | The interventions for each group with sufficient details to allow replication, including how and when they were actually administered   | Whether interventions pertain to the cluster level, the individual participant level or both                                                                                                                       |
| <b>Outcomes</b>                  | 6a      | Completely defined pre-specified primary and secondary outcome measures, including how and when they were assessed                      | Whether outcome measures pertain to the cluster level, the individual participant level or both                                                                                                                    |
|                                  | 6b      | Any changes to trial outcomes after the trial commenced, with reasons                                                                   |                                                                                                                                                                                                                    |
| <b>Sample size</b>               | 7a      | How sample size was determined                                                                                                          | Method of calculation, number of clusters(s) (and whether equal or unequal cluster sizes are assumed), cluster size, a coefficient of intracluster correlation (ICC or $k$ ), and an indication of its uncertainty |
|                                  | 7b      | When applicable, explanation of any interim analyses and stopping guidelines                                                            |                                                                                                                                                                                                                    |

| <b>Randomisation:</b>                                       |     |                                                                                                                                                                                             |                                                                                                                                                                                            |
|-------------------------------------------------------------|-----|---------------------------------------------------------------------------------------------------------------------------------------------------------------------------------------------|--------------------------------------------------------------------------------------------------------------------------------------------------------------------------------------------|
| <b>Sequence generation</b>                                  | 8a  | Method used to generate the random allocation sequence                                                                                                                                      |                                                                                                                                                                                            |
|                                                             | 8b  | Type of randomisation; details of any restriction (such as blocking and block size)                                                                                                         | Details of stratification or matching if used                                                                                                                                              |
| <b>Allocation concealment mechanism</b>                     | 9   | Mechanism used to implement the random allocation sequence (such as sequentially numbered containers), describing any steps taken to conceal the sequence until interventions were assigned | Specification that allocation was based on clusters rather than individuals and whether allocation concealment (if any) was at the cluster level, the individual participant level or both |
| <b>Implementation</b>                                       | 10  | Who generated the random allocation sequence, who enrolled participants, and who assigned participants to interventions                                                                     | Replace by 10a, 10b and 10c                                                                                                                                                                |
|                                                             | 10a |                                                                                                                                                                                             | Who generated the random allocation sequence, who enrolled clusters, and who assigned clusters to interventions                                                                            |
|                                                             | 10b |                                                                                                                                                                                             | Mechanism by which individual participants were included in clusters for the purposes of the trial (such as complete enumeration, random sampling)                                         |
|                                                             | 10c |                                                                                                                                                                                             | From whom consent was sought (representatives of the cluster, or individual cluster members, or both), and whether consent was sought before or after randomisation                        |
| <b>Blinding</b>                                             | 11a | If done, who was blinded after assignment to interventions (for example, participants, care providers, those assessing outcomes) and how                                                    |                                                                                                                                                                                            |
|                                                             | 11b | If relevant, description of the similarity of interventions                                                                                                                                 |                                                                                                                                                                                            |
| <b>Statistical methods</b>                                  | 12a | Statistical methods used to compare groups for primary and secondary outcomes                                                                                                               | How clustering was taken into account                                                                                                                                                      |
|                                                             | 12b | Methods for additional analyses, such as subgroup analyses and adjusted analyses                                                                                                            |                                                                                                                                                                                            |
| <b>Results</b>                                              |     |                                                                                                                                                                                             |                                                                                                                                                                                            |
| <b>Participant flow (a diagram is strongly recommended)</b> | 13a | For each group, the numbers of participants who were randomly assigned, received                                                                                                            | For each group, the numbers of clusters that were randomly assigned, received intended                                                                                                     |

|                                |     |                                                                                                                                                   |                                                                                                                                               |
|--------------------------------|-----|---------------------------------------------------------------------------------------------------------------------------------------------------|-----------------------------------------------------------------------------------------------------------------------------------------------|
|                                |     | intended treatment, and were analysed for the primary outcome                                                                                     | treatment, and were analysed for the primary outcome                                                                                          |
|                                | 13b | For each group, losses and exclusions after randomisation, together with reasons                                                                  | For each group, losses and exclusions for both clusters and individual cluster members                                                        |
| <b>Recruitment</b>             | 14a | Dates defining the periods of recruitment and follow-up                                                                                           |                                                                                                                                               |
|                                | 14b | Why the trial ended or was stopped                                                                                                                |                                                                                                                                               |
| <b>Baseline data</b>           | 15  | A table showing baseline demographic and clinical characteristics for each group                                                                  | Baseline characteristics for the individual and cluster levels as applicable for each group                                                   |
| <b>Numbers analysed</b>        | 16  | For each group, number of participants (denominator) included in each analysis and whether the analysis was by original assigned groups           | For each group, number of clusters included in each analysis                                                                                  |
| <b>Outcomes and estimation</b> | 17a | For each primary and secondary outcome, results for each group, and the estimated effect size and its precision (such as 95% confidence interval) | Results at the individual or cluster level as applicable and a coefficient of intracluster correlation (ICC or $k$ ) for each primary outcome |
|                                | 17b | For binary outcomes, presentation of both absolute and relative effect sizes is recommended                                                       |                                                                                                                                               |
| <b>Ancillary analyses</b>      | 18  | Results of any other analyses performed, including subgroup analyses and adjusted analyses, distinguishing pre-specified from exploratory         |                                                                                                                                               |
| <b>Harms</b>                   | 19  | All important harms or unintended effects in each group (for specific guidance see CONSORT for harms <sup>iii</sup> )                             |                                                                                                                                               |
| <b>Discussion</b>              |     |                                                                                                                                                   |                                                                                                                                               |
| <b>Limitations</b>             | 20  | Trial limitations, addressing sources of potential bias, imprecision, and, if relevant, multiplicity of analyses                                  |                                                                                                                                               |
| <b>Generalisability</b>        | 21  | Generalisability (external validity, applicability) of the trial findings                                                                         | Generalisability to clusters and/or individual participants (as relevant)                                                                     |
| <b>Interpretation</b>          | 22  | Interpretation consistent with results, balancing benefits and harms, and considering other relevant evidence                                     |                                                                                                                                               |
| <b>Other information</b>       |     |                                                                                                                                                   |                                                                                                                                               |

|                     |    |                                                                                 |
|---------------------|----|---------------------------------------------------------------------------------|
| <b>Registration</b> | 23 | Registration number and name of trial registry                                  |
| <b>Protocol</b>     | 24 | Where the full trial protocol can be accessed, if available                     |
| <b>Funding</b>      | 25 | Sources of funding and other support (such as supply of drugs), role of funders |

\* Note: page numbers optional depending on journal requirements

- 
- i Hopewell S, Clarke M, Moher D, Wager E, Middleton P, Altman DG, et al. CONSORT for reporting randomised trials in journal and conference abstracts. *Lancet* 2008, 371:281-283
  - ii Hopewell S, Clarke M, Moher D, Wager E, Middleton P, Altman DG at al (2008) CONSORT for reporting randomized controlled trials in journal and conference abstracts: explanation and elaboration. *PLoS Med* 5(1): e20
  - iii Ioannidis JP, Evans SJ, Gotzsche PC, O'Neill RT, Altman DG, Schulz K, Moher D. Better reporting of harms in randomized trials: an extension of the CONSORT statement. *Ann Intern Med* 2004; 141(10):781-788.
